# Supplementary material
Source: Springer Nature journal article supplement (https://www.springermedizin.de/resource/supplementary/13031_2013_115_MOESM1_ESM.pdf/9645134)

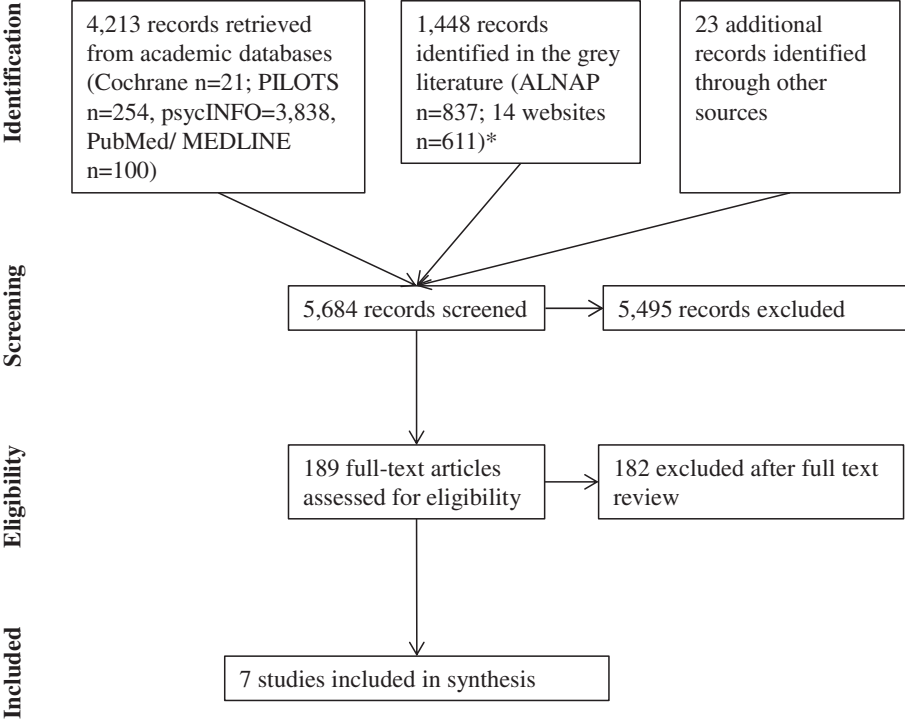

Supplement: MOESM1 [file 9645134]
